# Supplementary material for: Changing Patterns in Cancer Mortality from 1987 to 2020 in China
Source: MDPI journal article supplement (doi:10.3390/cancers15020476), 2023-01-12
Supplement: s1 [file s1]

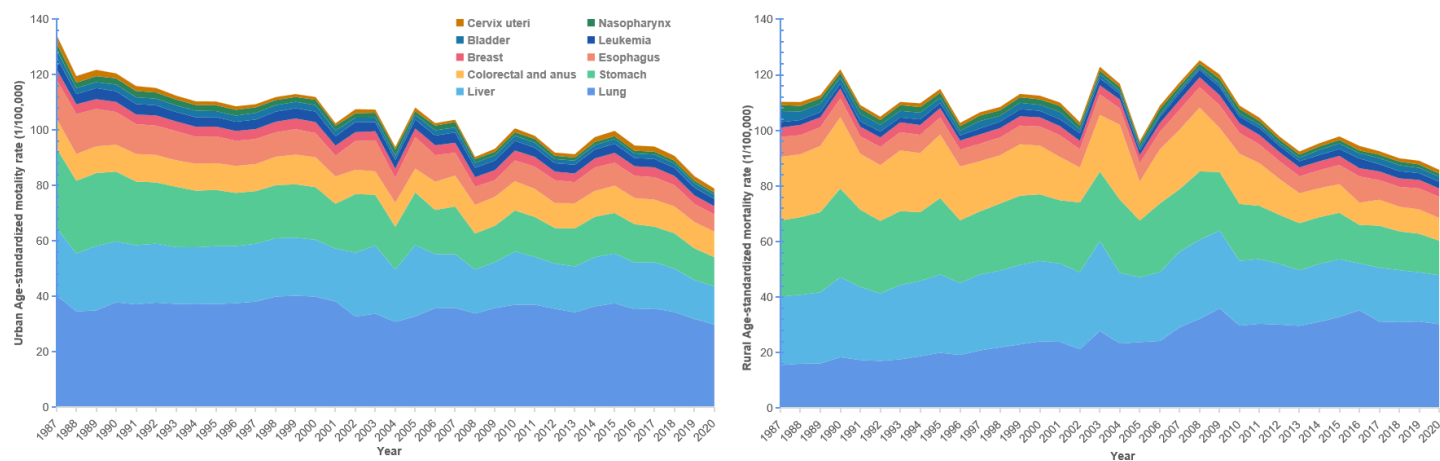

**Figure S1.** Trends in specific cancer ASMR in urban and rural populations in China, from 1987 to 2020.

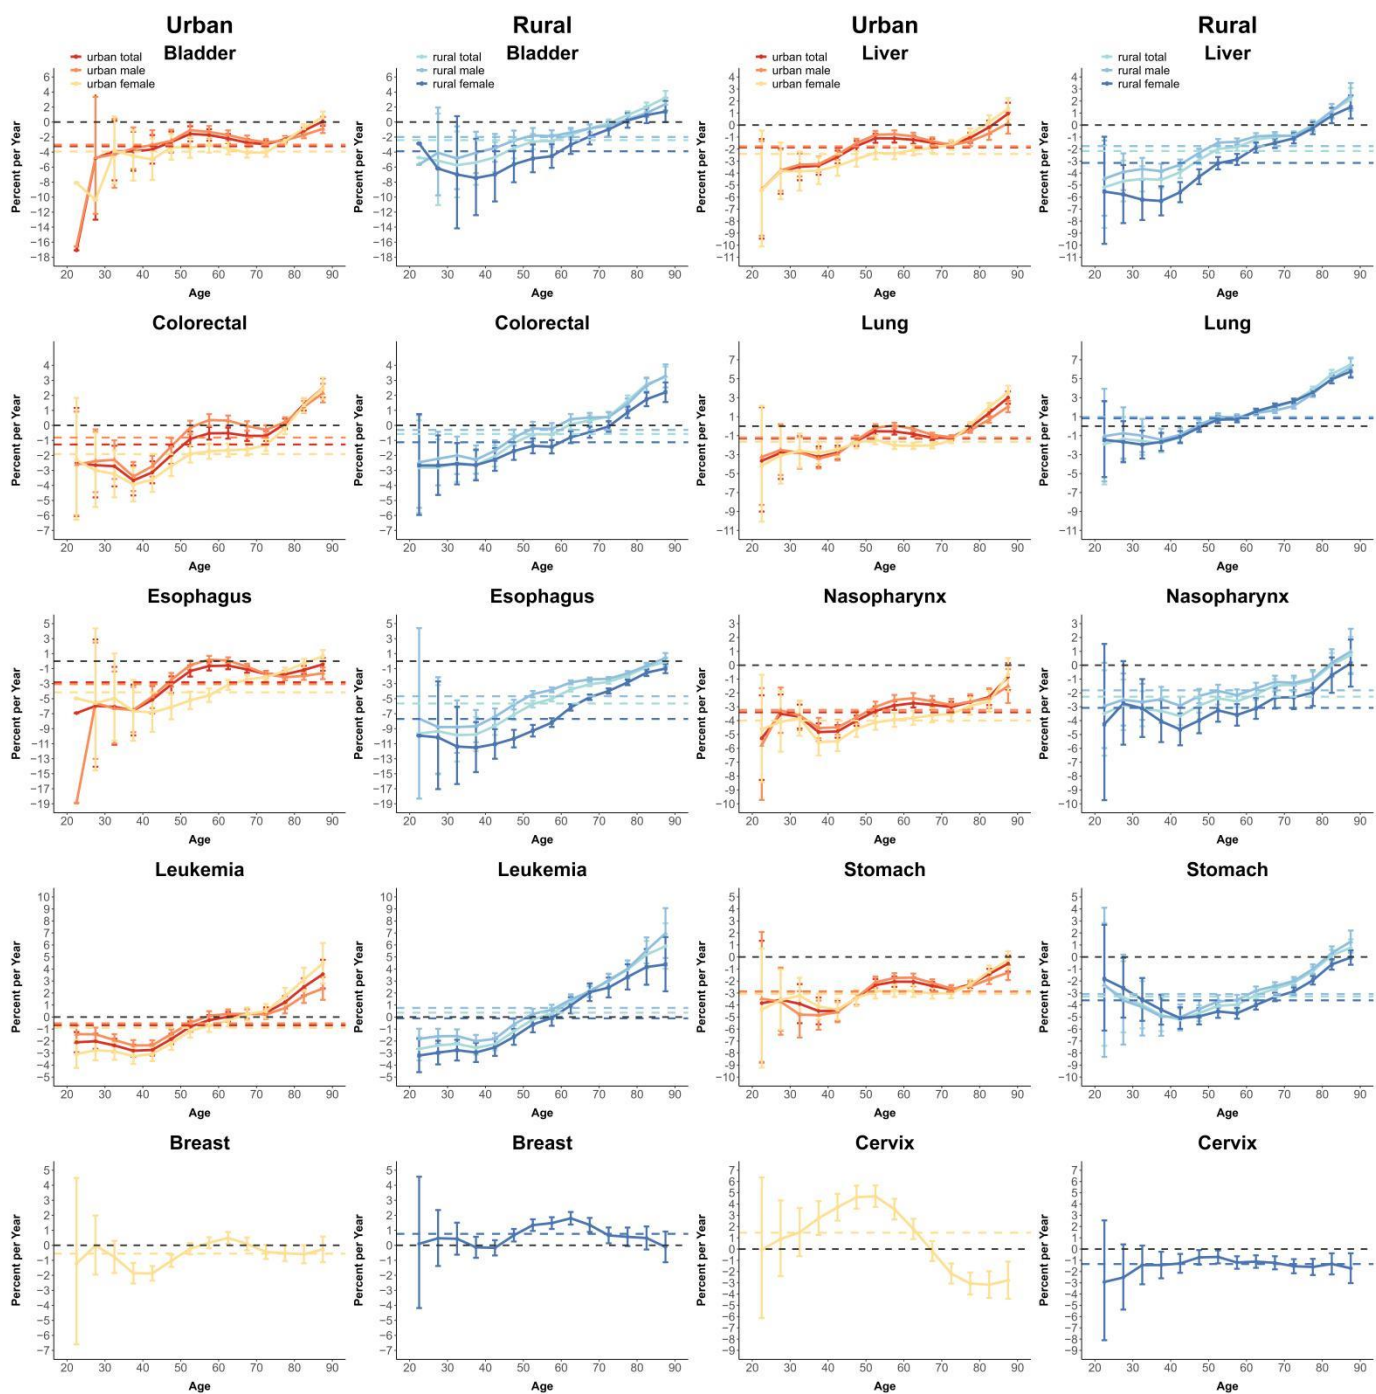

**Figure S2.** Local drift with net drift values for selected cancers mortality in rural and urban China, from 1987 to 2020

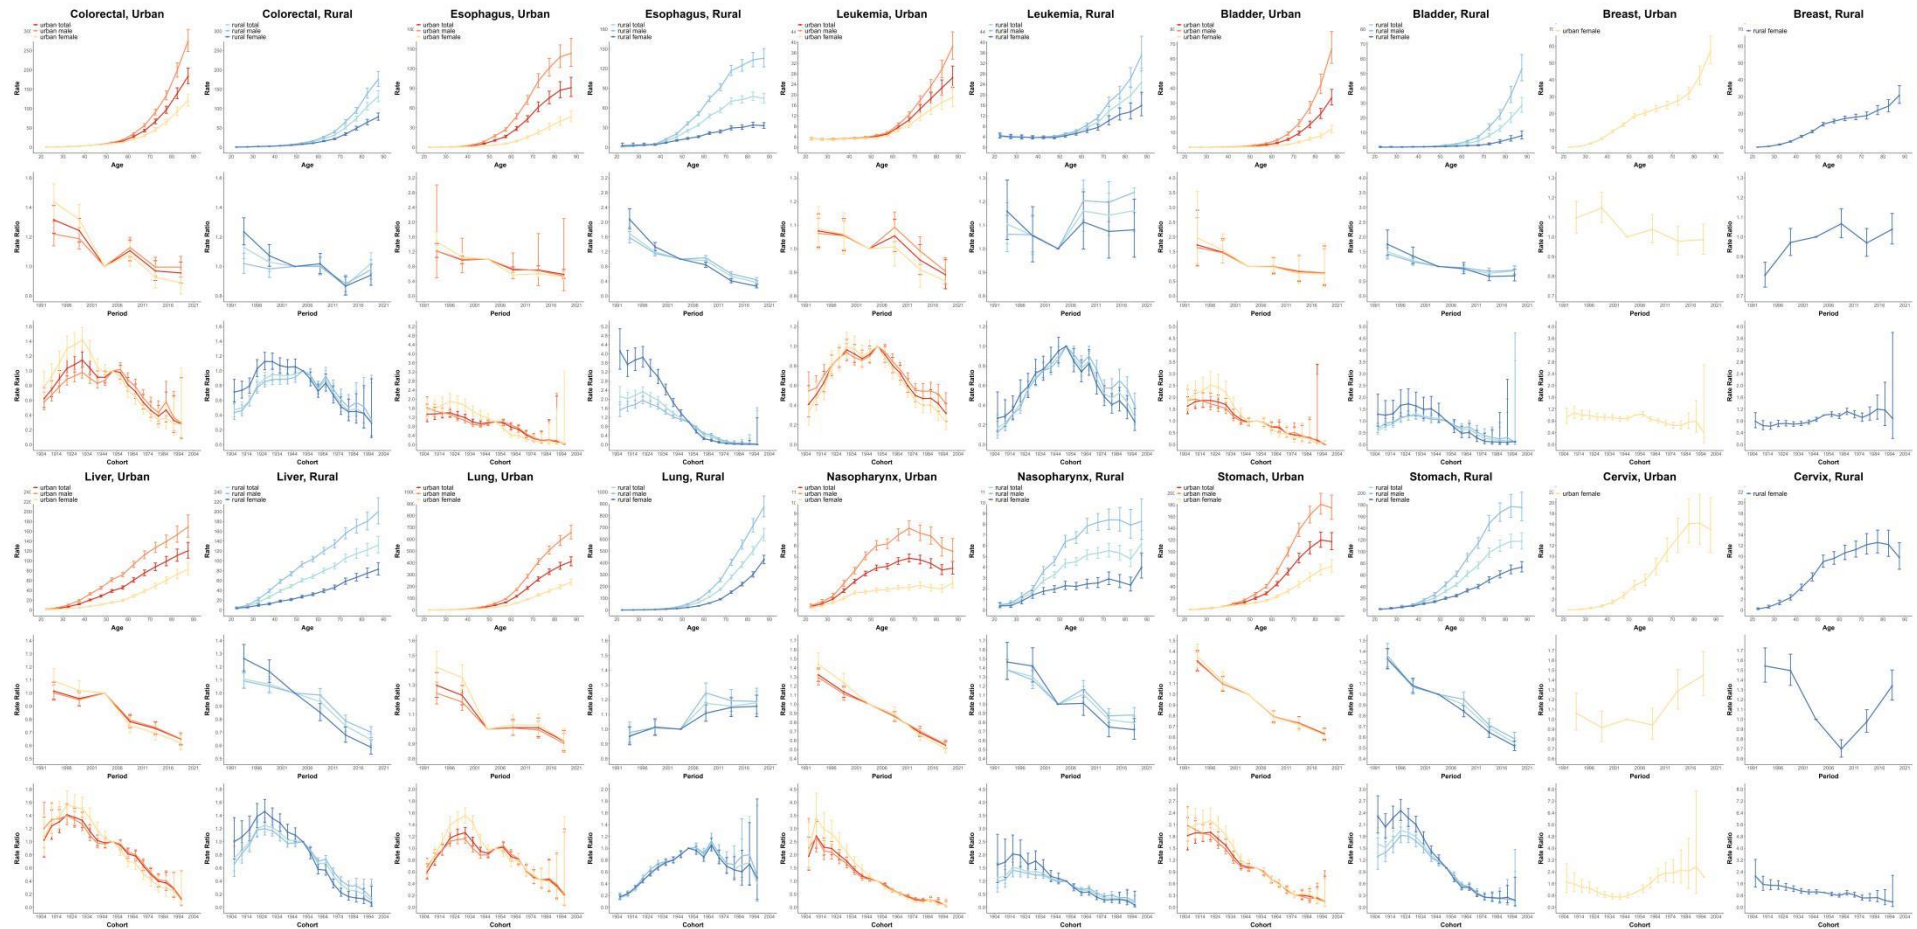

**Figure S3.** Parameter estimates of age, period, and cohort effects on selected cancer site mortality rate in China from 1987 to 2020.

**Table S1.** Period Age-standardized mortality rates of selected cancer site in urban and rural China.

| Area-Sex     | Cancer Site         | Period Age-Standardized Mortality Rates (1/100,000) |           |           |           |           |           |           |
|--------------|---------------------|-----------------------------------------------------|-----------|-----------|-----------|-----------|-----------|-----------|
|              |                     | 1987-1991                                           | 1992-1996 | 1997-2001 | 2002-2006 | 2007-2011 | 2012-2016 | 2017-2020 |
| Rural-male   | All cancers         | 163.86                                              | 161.74    | 162.04    | 167.40    | 192.22    | 157.92    | 149.04    |
|              | Bladder             | 2.06                                                | 2.08      | 2.02      | 1.92      | 2.21      | 1.97      | 2.22      |
|              | Breast              | 0.00                                                | 0.00      | 0.00      | 0.00      | 0.00      | 0.00      | 0.00      |
|              | Cervix uteri        | 0.00                                                | 0.00      | 0.00      | 0.00      | 0.00      | 0.00      | 0.00      |
|              | Colorectal and anus | 7.72                                                | 7.22      | 8.19      | 8.02      | 9.26      | 8.04      | 9.22      |
|              | Leukemia            | 3.85                                                | 3.69      | 3.73      | 3.46      | 4.08      | 3.72      | 3.65      |
|              | Liver               | 38.17                                               | 39.03     | 40.47     | 39.31     | 39.82     | 30.95     | 27.80     |
|              | Lung                | 25.13                                               | 27.83     | 33.01     | 35.34     | 47.82     | 44.69     | 44.97     |
|              | Nasopharynx         | 2.72                                                | 2.69      | 2.76      | 2.17      | 2.22      | 1.82      | 1.83      |
|              | Esophagus           | 30.42                                               | 28.55     | 23.99     | 25.85     | 27.90     | 16.36     | 13.73     |
|              | Stomach             | 38.73                                               | 35.26     | 31.89     | 33.19     | 31.32     | 23.69     | 20.03     |
| Rural-female | All cancers         | 91.25                                               | 88.51     | 88.75     | 86.05     | 89.81     | 78.48     | 74.84     |
|              | Bladder             | 0.53                                                | 0.67      | 0.58      | 0.50      | 0.51      | 0.44      | 0.49      |
|              | Breast              | 3.58                                                | 3.65      | 4.70      | 4.48      | 5.13      | 4.57      | 4.88      |
|              | Cervix uteri        | 5.79                                                | 4.00      | 4.71      | 2.17      | 2.16      | 3.30      | 3.96      |
|              | Colorectal and anus | 5.99                                                | 5.68      | 5.64      | 5.31      | 5.78      | 5.09      | 5.62      |
|              | Leukemia            | 3.21                                                | 3.20      | 2.93      | 2.81      | 2.94      | 2.75      | 2.51      |
|              | Liver               | 14.34                                               | 14.88     | 15.95     | 13.78     | 12.85     | 10.39     | 9.18      |
|              | Lung                | 9.21                                                | 10.69     | 13.33     | 13.33     | 16.93     | 17.95     | 17.90     |
|              | Nasopharynx         | 1.25                                                | 1.14      | 1.29      | 0.84      | 0.81      | 0.63      | 0.63      |
|              | Esophagus           | 16.62                                               | 14.95     | 11.45     | 11.82     | 10.46     | 5.42      | 4.18      |
|              | Stomach             | 19.89                                               | 17.33     | 16.15     | 15.74     | 12.88     | 10.06     | 8.16      |
| Urban-male   | All cancers         | 191.64                                              | 181.06    | 178.58    | 171.03    | 167.44    | 160.36    | 147.38    |
|              | Bladder             | 3.91                                                | 3.96      | 3.93      | 2.79      | 3.05      | 2.68      | 2.63      |
|              | Bladder             | 0.00                                                | 0.00      | 0.00      | 0.00      | 0.00      | 0.00      | 0.00      |
|              | Breast              | 0.00                                                | 0.00      | 0.00      | 0.00      | 0.00      | 0.00      | 0.00      |
|              | Colorectal and anus | 10.81                                               | 11.09     | 11.82     | 10.73     | 12.81     | 11.48     | 12.06     |
|              | Leukemia            | 4.44                                                | 3.90      | 4.14      | 3.85      | 4.12      | 3.65      | 3.37      |
|              | Liver               | 32.90                                               | 30.75     | 30.34     | 33.28     | 26.59     | 25.66     | 22.56     |
|              | Lung                | 51.73                                               | 53.75     | 55.66     | 48.62     | 51.91     | 51.80     | 48.16     |
|              | Nasopharynx         | 3.10                                                | 3.09      | 2.66      | 2.52      | 2.19      | 1.69      | 1.44      |
|              | Esophagus           | 18.89                                               | 15.45     | 13.56     | 15.68     | 11.79     | 12.65     | 11.13     |
|              | Stomach             | 36.44                                               | 29.62     | 26.18     | 25.31     | 20.72     | 19.82     | 17.11     |
| Urban-female | All cancers         | 108.52                                              | 98.91     | 100.04    | 88.98     | 90.08     | 84.10     | 77.30     |
|              | Bladder             | 1.17                                                | 1.10      | 1.05      | 0.76      | 0.81      | 0.68      | 0.67      |
|              | Breast              | 6.88                                                | 6.87      | 7.34      | 6.35      | 6.80      | 6.37      | 6.27      |
|              | Cervix uteri        | 4.10                                                | 2.62      | 1.95      | 2.08      | 2.01      | 3.13      | 3.27      |

|  |                     |       |       |       |       |       |       |       |
|--|---------------------|-------|-------|-------|-------|-------|-------|-------|
|  | Colorectal and anus | 9.20  | 8.69  | 9.05  | 7.43  | 8.60  | 7.43  | 7.28  |
|  | Leukemia            | 3.48  | 3.06  | 3.07  | 2.92  | 2.87  | 2.65  | 2.37  |
|  | Liver               | 12.04 | 11.31 | 11.22 | 11.69 | 9.16  | 8.76  | 7.78  |
|  | Lung                | 23.49 | 23.20 | 24.97 | 19.05 | 21.62 | 20.93 | 18.74 |
|  | Nasopharynx         | 1.37  | 1.19  | 1.10  | 0.91  | 0.78  | 0.56  | 0.47  |
|  | Esophagus           | 7.69  | 5.28  | 4.44  | 5.34  | 3.15  | 3.89  | 3.35  |
|  | Stomach             | 16.51 | 13.31 | 11.94 | 11.32 | 9.08  | 8.51  | 7.16  |
